# Supplementary material
Source: PubMed Central journal article supplement (PMC8709883)
Supplement: NIHMS1758389-supplement-1.pdf [file NIHMS1758389-supplement-1.pdf]

## Supplemental Material

## Supplemental Table S1

*Factor Loadings of the Bifactor Model of Conscientiousness*

| General Factor    | Facets       |       |                 |                |        |                |
|-------------------|--------------|-------|-----------------|----------------|--------|----------------|
|                   | Self-Control | Order | Industriousness | Traditionalism | Virtue | Responsibility |
| Conscientiousness | .626         | .700  | .598            | .619           | .909   | .785           |
| Parcels           |              |       |                 |                |        |                |
| Self-Control 1    | .751         |       |                 |                |        |                |
| Self-Control 2    | .630         |       |                 |                |        |                |
| Order 1           |              | .384  |                 |                |        |                |
| Order 2           |              | .571  |                 |                |        |                |
| Industriousness 1 |              |       | .795            |                |        |                |
| Industriousness 2 |              |       | .723            |                |        |                |
| Traditionalism 1  |              |       |                 | .515           |        |                |
| Traditionalism 2  |              |       |                 | .739           |        |                |
| Virtue 1          |              |       |                 |                | .446   |                |
| Virtue 2          |              |       |                 |                | .454   |                |
| Responsibility 1  |              |       |                 |                |        | .718           |
| Responsibility 2  |              |       |                 |                |        | .632           |
| Variances         | .392         | .489  | .358            | .383           | .827   | .616           |

*Note.* Table shows the standardized factor loadings of the facets on the general factor and the standardized factor loadings of the parcels on their corresponding facet. All factor loadings were significant at  $p < .001$ .

Supplemental Table S2

*Bivariate correlations for all analytic variables*

|                            | 1.     | 2.     | 3.     | 4.     | 5.     | 6.     | 7.     | 8.     | 9.     | 10.    | 11.    |
|----------------------------|--------|--------|--------|--------|--------|--------|--------|--------|--------|--------|--------|
| 1. Age                     | --     |        |        |        |        |        |        |        |        |        |        |
| 2. Sex                     | .00    | --     |        |        |        |        |        |        |        |        |        |
| 3. Race (African American) | -.08** | .08**  | --     |        |        |        |        |        |        |        |        |
| 4. Race (Other)            | -.07** | .01    | -.08** | --     |        |        |        |        |        |        |        |
| 5. Hispanic                | -.08** | -.02   | -.10** | .32**  | --     |        |        |        |        |        |        |
| 6. Education               | -.09** | -.07** | -.10** | -.10** | -.34** | --     |        |        |        |        |        |
| 7. Informant age (years)   | .19**  | -.13** | -.15** | -.01   | -.06** | .09**  | --     |        |        |        |        |
| 8. Informant sex (female)  | .12**  | -.35** | .03    | .00    | .02    | -.05*  | -.15** | --     |        |        |        |
| 9. Informant education     | .00    | .03    | -.05*  | -.06** | -.27** | .48**  | -.11** | .00    | --     |        |        |
| 10. Spouse                 | -.19** | -.21** | -.17** | .01    | .02    | .09**  | .56**  | -.21** | -.07** | --     |        |
| 11. Years known informant  | -.02   | -.22** | -.12** | .01    | .00    | .06**  | .61**  | -.15** | -.08** | .70**  | --     |
| 12. Self-control           | .01    | -.01   | .07**  | -.07** | -.09** | .13**  | .01    | .01    | .09**  | -.01   | .04*   |
| 13. Order                  | .04*   | .03    | -.04*  | -.02   | -.03   | .10**  | .05*   | -.02   | .07**  | .03    | .04*   |
| 14. Industriousness        | -.11** | .01    | -.05*  | -.05*  | -.13** | .21**  | .03    | -.01   | .17**  | .04*   | .04*   |
| 15. Traditionalism         | .08**  | .19**  | -.05*  | -.01   | .00    | .04*   | .02    | -.08** | .00    | -.06** | .00    |
| 16. Virtue                 | .08**  | .15**  | -.08** | -.05*  | -.07** | .09**  | .02    | -.06** | .05*   | -.02   | .03    |
| 17. Responsibility         | .00    | .07**  | -.12** | -.12** | -.18** | .25**  | .07**  | -.05** | .12**  | .05*   | .07**  |
| 18. Conscientiousness      | .03    | .11**  | -.07** | -.08** | -.14** | .22**  | .06**  | -.06** | .14**  | .01    | .06**  |
| 19. Cognition total        | -.41** | -.01   | -.26** | -.08** | -.15** | .48**  | .01    | -.08** | .26**  | .15**  | .08**  |
| 20. Informant cognition    | .29**  | -.07** | -.05*  | -.02   | -.02   | -.08** | -.01   | .11**  | -.01   | -.01   | -.01   |
| 21. Positive affect        | -.10** | .06**  | -.06*  | -.07** | -.09** | .16**  | -.06** | .02    | .16**  | -.05*  | -.06** |
| 22. Negative affect        | .14**  | .01    | -.04   | .02    | .06**  | -.10** | -.01   | -.01   | -.09** | -.03   | -.04   |
| 23. Passive activities     | .20**  | -.13** | -.12** | -.02   | -.01   | -.09** | .00    | .09**  | -.04*  | .00    | .01    |
| 24. Cognitive activities   | -.22** | .02    | -.07** | -.05*  | -.16** | .36**  | .01    | -.08** | .20**  | .06**  | .02    |
| 25. Outside activities     | -.20** | -.03   | -.02   | -.02   | -.02   | .22**  | .00    | -.04*  | .15**  | .00    | .01    |

Table S2 Continued

|                          | 12.    | 13.    | 14.    | 15.   | 16.    | 17.    | 18.    | 19.    | 20.    | 21.    | 22.    |
|--------------------------|--------|--------|--------|-------|--------|--------|--------|--------|--------|--------|--------|
| 12. Self-control         | --     |        |        |       |        |        |        |        |        |        |        |
| 13. Order                | .28**  | --     |        |       |        |        |        |        |        |        |        |
| 14. Industriousness      | .28**  | .28**  | --     |       |        |        |        |        |        |        |        |
| 15. Traditionalism       | .20**  | .19**  | .20**  | --    |        |        |        |        |        |        |        |
| 16. Virtue               | .25**  | .18**  | .18**  | .36** | --     |        |        |        |        |        |        |
| 17. Responsibility       | .30**  | .23**  | .36**  | .27** | .36**  | --     |        |        |        |        |        |
| 18. Conscientiousness    | .63**  | .59**  | .63**  | .59** | .63**  | .59**  | --     |        |        |        |        |
| 19. Cognition total      | .11**  | .08**  | .24**  | .06** | .09**  | .23**  | .22**  | --     |        |        |        |
| 20. Informant cognition  | -.04*  | -.09** | -.10** | .00   | .00    | -.05*  | -.08** | -.40** | --     |        |        |
| 21. Positive affect      | .08**  | .07**  | .16**  | .02   | .01    | .11**  | .12**  | .25**  | -.48** | --     |        |
| 22. Negative affect      | -.06** | -.05*  | -.12** | .00   | -.02   | -.07** | -.09** | -.27** | -.57** | -.54** | --     |
| 23. Passive activities   | -.05*  | -.07** | -.19** | -.05* | -.07** | -.13** | -.15** | -.30** | .36**  | -.31** | .24**  |
| 24. Cognitive activities | .05**  | .03    | .12**  | -.02  | .03    | .14**  | .10**  | .48**  | -.26** | .25**  | -.18** |
| 25. Outside activities   | .04    | .06**  | .16**  | .02   | .02    | .11**  | .11**  | .33**  | -.35** | .32**  | -.22** |

*Table S2 Continued*

|                          | 23.    | 24.   | 25. |
|--------------------------|--------|-------|-----|
| 23. Passive activities   | --     |       |     |
| 24. Cognitive activities | -.18** | --    |     |
| 25. Outside activities   | -.41** | .26** | --  |

Supplemental Table S3

*Bivariate correlations between the facets and the individual indicators of cognition, informant-rated cognition, and informant-rated activities*

|                      | Self-Control | Order  | Industriousness | Traditionalism | Virtue | Responsibility |
|----------------------|--------------|--------|-----------------|----------------|--------|----------------|
| Memory               | .06**        | .03    | .17**           | .08**          | .08**  | .18**          |
| Speed-attention      | .08**        | .10**  | .26**           | .06**          | .08**  | .20**          |
| Visuospatial ability | .10**        | .08**  | .20**           | .05*           | .10**  | .20**          |
| Language             | .08**        | .06**  | .16**           | .06**          | .06**  | .16**          |
| Numeric reasoning    | .11**        | .05*   | .13**           | -.02           | .04    | .16**          |
| Informant cognition  | -.04*        | -.09** | -.10**          | .00            | .00    | -.05*          |
| Jorm                 | -.01         | -.05*  | -.04            | .02            | .02    | .00            |
| Blessed              | -.01         | -.06** | -.08**          | .02            | .02    | -.05*          |
| CSID                 | -.09**       | -.13** | -.12**          | -.04*          | -.05*  | -.08**         |
| Total 1066           | -.03         | -.06** | -.08**          | -.01           | .00    | -.04*          |
| Positive affect      | .08**        | .07**  | .16**           | .02            | .01    | .11**          |
| Negative affect      | -.06**       | -.05*  | -.12**          | .00            | -.02   | -.07**         |
| TV                   | -.05*        | -.03   | -.14**          | -.02           | -.06** | -.09**         |
| Napping              | -.04         | -.07** | -.12**          | -.05*          | -.04*  | -.12**         |
| Chores (reversed)    | -.01         | -.05*  | -.14**          | -.04           | -.04*  | -.07**         |
| Reading              | .07**        | .06**  | .05*            | .01            | .04    | .10**          |
| Computer use         | .03          | .00    | .13**           | -.03           | .02    | .12**          |
| Work/volunteering    | -.03         | -.01   | -.18**          | -.04*          | -.04   | -.12**         |
| Store                | .01          | .00    | -.10**          | -.02           | -.02   | -.04           |
| Walk                 | -.01         | -.04** | -.06**          | .02            | -.02   | -.04           |
| Sports/exercise      | -.05*        | -.08** | -.10**          | -.01           | .01    | -.08**         |
